# Supplementary material for: Contribution à la construction d'un système robuste d'analyse du français
Source: eLife journal article supplement (doi:10.7554/elife.53169), 1991-01-01
Supplement: supp [file elife-53169-supp-v1.zip]

Archive with 5 entries (5 files):
- elife_poa_e53169_Figure_2_figure_supplement_2.pdf
- elife_poa_e53169_Transparent_Reporting_File.pdf
- elife_poa_e53169_Figure_4_figure_supplement_1.pdf
- elife_poa_e53169_Figure_4_figure_supplement_2.pdf
- elife_poa_e53169_Figure_2_figure_supplement_1.pdf
