# Supplementary material for: Contribution à la construction d'un système robuste d'analyse du français
Source: eLife journal article supplement (doi:10.7554/elife.53169), 1991-01-01
Supplement: supp [file elife-53169-supp-v1.zip]

| List of AR3X heavy chain (chain H)-E2ecto <sub>b09</sub> (chain C) interface residues<br>(the residues on each row are not matched interactive partners) |                  |                       |                        |      |                       |
|----------------------------------------------------------------------------------------------------------------------------------------------------------|------------------|-----------------------|------------------------|------|-----------------------|
| Heavy chain                                                                                                                                              | Bond             | BSA (Å <sup>2</sup> ) | E2ecto <sub>b09</sub>  | Bond | BSA (Å <sup>2</sup> ) |
| H:SER 30                                                                                                                                                 |                  | 13                    | C:TRP 420              |      | 17                    |
| H:SER 31                                                                                                                                                 |                  | 30                    | C:ILE 422              |      | 56                    |
| H:PHE 32                                                                                                                                                 |                  | 27                    | C:THR 425              |      | 11                    |
| H:PHE 52                                                                                                                                                 |                  | 16                    | C:LEU 427              |      | 74                    |
| H:ALA 52b                                                                                                                                                |                  | 6                     | C:ASN 428              |      | 12                    |
| H:PRO 52c                                                                                                                                                | H                | 73                    | C:CYS 429              | H    | 30                    |
| H:GLY 52d                                                                                                                                                |                  | 16                    | C:ASN 430              | H    | 21                    |
| H:PRO 52e                                                                                                                                                | H                | 32                    | C:ASP 431              | H    | 27                    |
| H:GLU 52f                                                                                                                                                |                  | 24                    | C:SER 432              |      | 22                    |
| H:ARG 52g                                                                                                                                                | H                | 162                   | C:HIS 434              | S    | 133                   |
| H:TRP 52i                                                                                                                                                | H                | 114                   | C:THR 435              |      | 1                     |
| H:LEU 52j                                                                                                                                                |                  | 74                    | C:GLY 436              |      | 23                    |
| H:ILE 52m                                                                                                                                                |                  | 47                    | C:LEU 438              |      | 48                    |
| H:ASN 52n                                                                                                                                                | H                | 30                    | C:ALA 439              |      | 60                    |
| H:PRO 52o                                                                                                                                                |                  | 1                     | C:ALA 440              | H    | 7                     |
| H:ILE 53                                                                                                                                                 |                  | 4                     | C:LEU 441              |      | 16                    |
| H:ARG 94                                                                                                                                                 |                  | 22                    | C:PHE 442              | H    | 142                   |
| H:ASN 96                                                                                                                                                 | H                | 37                    | C:TYR 443              | H    | 156                   |
| H:PHE 98                                                                                                                                                 |                  | 79                    | C:THR 444              | H    | 77                    |
| H:ARG 99                                                                                                                                                 | H                | 81                    | C:HIS 445              | H    | 45                    |
| H:TYR 100                                                                                                                                                |                  | 23                    | C:LYS 446              |      | 2                     |
| H:CYS 100a                                                                                                                                               | H                | 75                    | C:PRO 505              |      | 11                    |
| H:ARG 100b                                                                                                                                               | S                | 45                    | C:TRP 529              |      | 63                    |
| H:GLY 100c                                                                                                                                               |                  | 58                    | C:GLU 531              | S    | 57                    |
| H:GLY 100d                                                                                                                                               |                  | 32                    | C:PRO 612              | H    | 18                    |
| H:CYS 100f                                                                                                                                               |                  | 10                    | C:TYR 613              | H    | 52                    |
| H:GLY 100i                                                                                                                                               |                  | 4                     | C:LEU 615              |      | 6                     |
| H:ASP 101                                                                                                                                                | S                | 20                    | C:TRP 616              |      | 6                     |
| Total                                                                                                                                                    |                  | 1155                  |                        |      | 1191                  |
| Hydrogen bonds                                                                                                                                           |                  |                       |                        |      |                       |
| ##                                                                                                                                                       | Heavy chain      | Distance (Å)          | E2ecto <sub>b09</sub>  |      |                       |
| 1                                                                                                                                                        | H:PRO 52c[ O ]   | 3.8                   | C:HIS 445[ ND1]        |      |                       |
| 2                                                                                                                                                        | H:PRO 52e[ O ]   | 3.0                   | C:THR 444[ N ]         |      |                       |
| 3                                                                                                                                                        | H:ARG 99[ O ]    | 2.8                   | C:ASP 431[ N ]         |      |                       |
| 4                                                                                                                                                        | H:CYS 100a[ O ]  | 3.1                   | C:CYS 429[ N ]         |      |                       |
| 5                                                                                                                                                        | H:CYS 100a[ N ]  | 2.9                   | C:CYS 429[ O ]         |      |                       |
| 6                                                                                                                                                        | H:ARG 99[ NH1]   | 2.7                   | C:ASN 430[ OD1]        |      |                       |
| 7                                                                                                                                                        | H:ASN 96[ ND2]   | 3.9                   | C:ASP 431[ OD2]        |      |                       |
| 8                                                                                                                                                        | H:ARG 52g[ NE ]  | 3.8                   | C:ALA 440[ O ]         |      |                       |
| 9                                                                                                                                                        | H:ARG 52g[ N ]   | 2.8                   | C:PHE 442[ O ]         |      |                       |
| 10                                                                                                                                                       | H:ARG 52g[ NE ]  | 3.4                   | C:TYR 443[ O ]         |      |                       |
| 11                                                                                                                                                       | H:ASN 52n[ ND2]  | 3.1                   | C:TYR 443[ OH ]        |      |                       |
| 12                                                                                                                                                       | H:ARG 52g[ NH1]  | 3.0                   | C:PRO 612[ O ]         |      |                       |
| 13                                                                                                                                                       | H:TRP 52i[ NE1]  | 2.9                   | C:TYR 613[ OH ]        |      |                       |
| Salt bridges                                                                                                                                             |                  |                       |                        |      |                       |
| ##                                                                                                                                                       | Heavy chain      | Distance (Å)          | E2core <sub>1a53</sub> |      |                       |
| 1                                                                                                                                                        | H:ASP 101[ OD1]  | 3.6                   | C:HIS 434[ NE2]        |      |                       |
| 2                                                                                                                                                        | H:ASP 101[ OD2]  | 3.9                   | C:HIS 434[ NE2]        |      |                       |
| 3                                                                                                                                                        | H:ARG 100b[ NH1] | 4.0                   | C:GLU 531[ OE1]        |      |                       |

| List of AR3X light chain (chain L)-E2ecto <sub>b09</sub> (chain C) interface residues<br>(the residues on each row are not matched interactive partners) |      |                       |                       |      |                       |
|----------------------------------------------------------------------------------------------------------------------------------------------------------|------|-----------------------|-----------------------|------|-----------------------|
| Light chain                                                                                                                                              | Bond | BSA (Å <sup>2</sup> ) | E2ecto <sub>b09</sub> | Bond | BSA (Å <sup>2</sup> ) |
| L:LEU 46                                                                                                                                                 |      | 1                     | C:SER 432             |      | 7                     |
| L:TYR 49                                                                                                                                                 |      | 1                     | C:HIS 434             |      | 6                     |
| L:PRO 56                                                                                                                                                 |      | 10                    |                       |      |                       |
| Total                                                                                                                                                    |      | 12                    | Total                 |      | 13                    |

| AR3X heavy chain (H) and light chain (L) residues interacting with E2ecto <sub>b09</sub><br>glycans (chain C) (interactive partners are grouped together) |      |                       |                       |      |                       |
|-----------------------------------------------------------------------------------------------------------------------------------------------------------|------|-----------------------|-----------------------|------|-----------------------|
| Ab chain                                                                                                                                                  | Bond | BSA (Å <sup>2</sup> ) | E2ecto <sub>b09</sub> | Bond | BSA (Å <sup>2</sup> ) |
| H:ARG 99                                                                                                                                                  | H    | 33                    | C:NAG4301             | H    | 71                    |
| H:TYR 100                                                                                                                                                 |      | 26                    |                       |      |                       |
| H:ILE 52m                                                                                                                                                 |      | 3                     | C:NAG4231             | H    | 30                    |
| H:GLY 100c                                                                                                                                                | H    | 15                    |                       |      |                       |
| H:GLY 100d                                                                                                                                                |      | 10                    |                       |      |                       |
| L:TYR 49                                                                                                                                                  |      | 11                    | C:NAG4301             |      | 11                    |
| H:GLY 100d                                                                                                                                                |      | 4                     | C:NAG4232             |      | 8                     |
| H:SER 100e                                                                                                                                                |      | 3                     |                       |      |                       |
| Total                                                                                                                                                     |      | 106                   | Total                 |      | 119                   |

\* Type of putative interaction: H - hydrogen bond, S - salt bridge. BSA: buried surface area, Å<sup>2</sup>.

Figure 4 –  
figure supplement 2
