# Supplementary material for: Contribution à la construction d'un système robuste d'analyse du français
Source: eLife journal article supplement (doi:10.7554/elife.53169), 1991-01-01
Supplement: supp [file elife-53169-supp-v1.zip › elife_poa_e53169_Figure_4_figure_supplement_1.pdf]

## Data collection and refinement statistics for AR3X-E2ecto<sub>1b09</sub> complex

| <i>Data collection</i>               |                                               |
|--------------------------------------|-----------------------------------------------|
| Space group                          | P2 <sub>1</sub> 2 <sub>1</sub> 2 <sub>1</sub> |
| Cell, Å (a, b, c)                    | 64.7, 69.2, 177.0                             |
| Angles (α, β, γ)                     | 90, 90, 90                                    |
| Wavelength (Å)                       | 0.98                                          |
| Resolution (Å)                       | 52.20-2.20<br>(2.28 - 2.20)                   |
| R <sub>pim</sub> (%)                 | 4.9 (61.0)                                    |
| R <sub>merge</sub> (%)               | 11.2 (136.2)                                  |
| I/σI                                 | 8.98 (1.20)                                   |
| Completeness (%)                     | 99.2 (99.6)                                   |
| Multiplicity                         | 6.0 (5.8)                                     |
| CC <sub>1/2</sub>                    | 99.7 (39.7)                                   |
| <i>Refinement statistics</i>         |                                               |
| Resolution (Å)                       | 52.20-2.20<br>(2.28 - 2.20)                   |
| Reflections                          |                                               |
| Measured                             | 243,660                                       |
| Unique                               | 40,892                                        |
| R <sub>work</sub> /R <sub>free</sub> | 18.7/23.4                                     |
| Wilson B-factor (Å <sup>2</sup> )    | 44.4                                          |
| Number of atoms                      | 5,124                                         |
| Protein                              | 4,697                                         |
| Carbohydrate                         | 225                                           |
| Solvent                              | 202                                           |
| R.m.s deviations                     |                                               |
| Bond lengths (Å)                     | 0.008                                         |
| Bond angles (°)                      | 1.41                                          |

Numbers in parentheses correspond to the highest resolution shell  
Resolution limits were extended to include weak intensity data

**Figure 4 – figure supplement 1**
