# Supplementary figures and images for: Contribution à la construction d'un système robuste d'analyse du français
Source: eLife journal article supplement (doi:10.7554/elife.53169), 1991-01-01

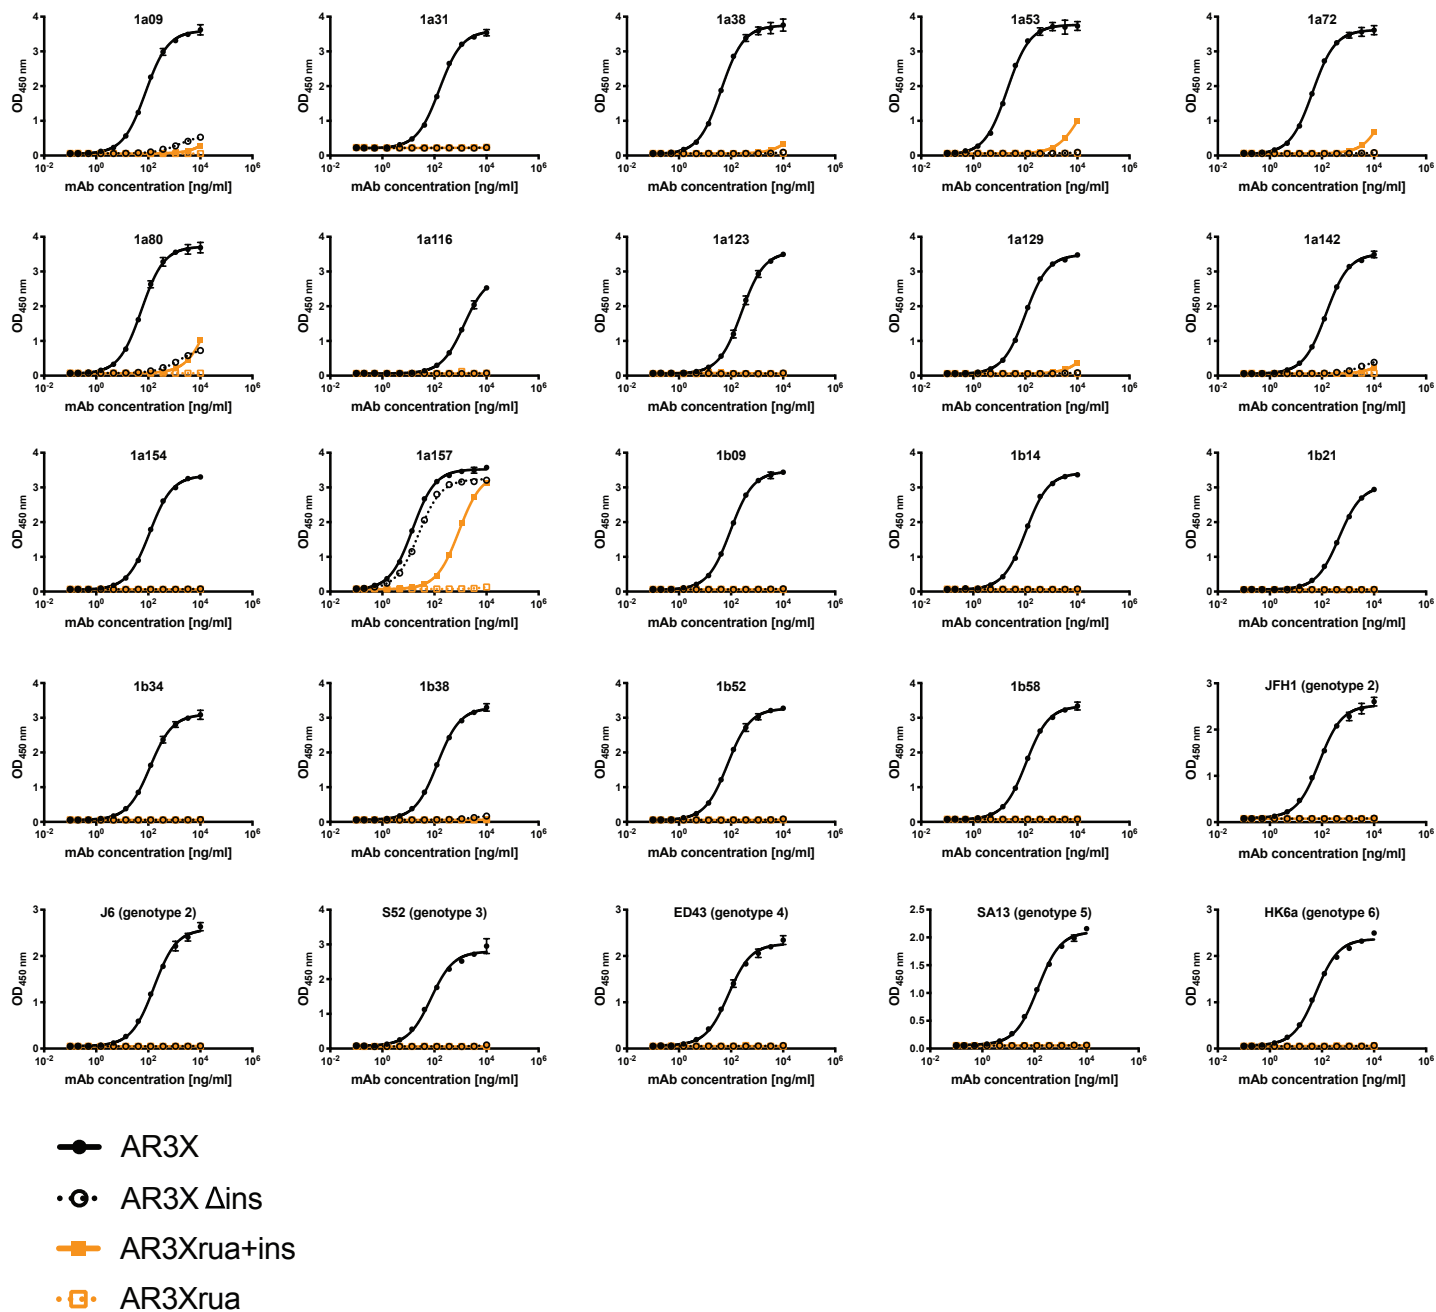

Figure 2 – figure supplement 1

Supplement: supp [file elife-53169-supp-v1.zip]

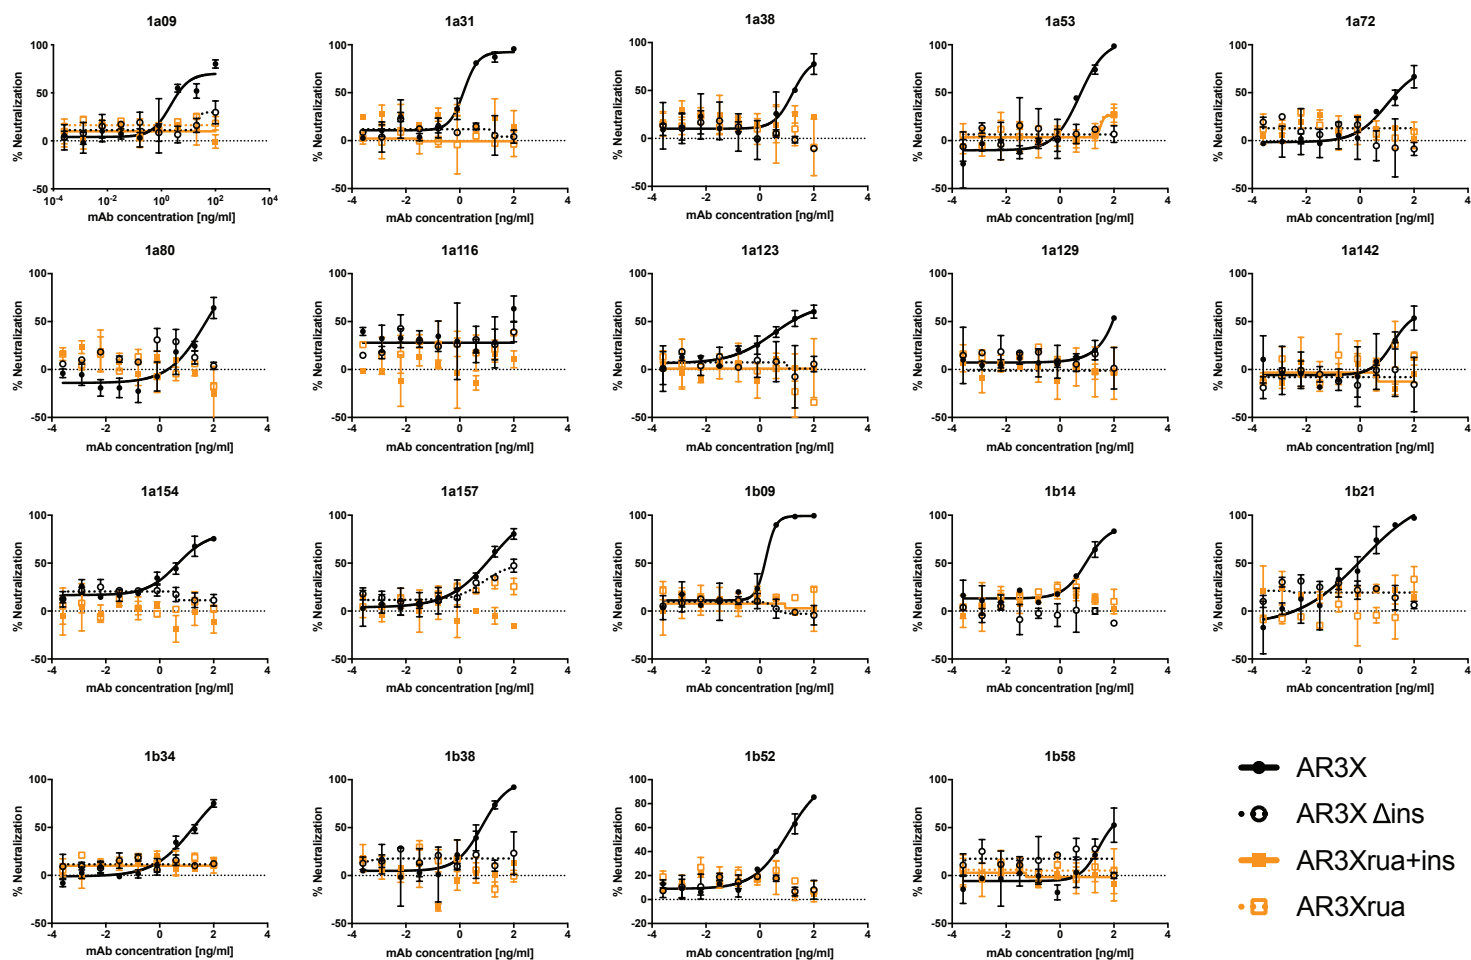

Figure 2 – figure supplement 2

Supplement: supp [file elife-53169-supp-v1.zip › elife_poa_e53169_Figure_2_figure_supplement_2.pdf]
